# Supplementary material for: Self-reconstruction of cationic activated Ni-MOFs enhanced the intrinsic activity of electrocatalytic water oxidation
Source: Royal Society of Chemistry journal article supplement (doi:10.1039/d1qi00857a), 2021-11-16
Supplement: d1qi00857a1.pdf [file d1qi00857a1.pdf]

## ***Supporting Information for***

### **Self-reconstruction of cationic activated Ni-MOFs enhanced the intrinsic activity of electrocatalytic water oxidation**

Xuemin Wang,<sup>a,b</sup> Xixi Wang,<sup>a,b</sup> Lin Zhao,<sup>a,b</sup> Hanyu Zhang,<sup>a,b</sup> Ming Liu,<sup>a</sup> Cui Zhang,<sup>\*a,b</sup> and Shuangxi Liu<sup>\*a,b,c,d</sup>

<sup>a</sup>*School of Materials Science and Engineering, Institute of New Catalytic Materials Science, Nankai University, Tianjin 300350, China*

*E-mail: zhangcui@nankai.edu.cn; sliu@nankai.edu.cn.*

<sup>b</sup>*National Institute for Advanced Materials, Nankai University, Tianjin 300350, China.*

<sup>c</sup>*Key Laboratory of Advanced Energy Materials Chemistry, Ministry of Education, Nankai University, Tianjin 300071, China.*

<sup>d</sup>*Collaborative Innovation Center of Chemical Science and Engineering, Tianjin 300072, China*

### **Related calculation formulas and equations**

Overpotential ( $\eta$ ) was calculated by the following equation:

$$\eta \text{ (V)} = E_{\text{RHE}} - 1.23 \text{ V} \quad (1)$$

Tafel plots are showed with the linear portions at overpotential fitted to the Tafel equation:

$$\eta = b \log j + a \quad (2)$$

Where  $\eta$  is overpotential,  $j$  is the current density,  $b$  is the Tafel slope, and  $a$  is the exchange current density.

***Instruments for Material characterizations:*** The powder X-ray diffraction (XRD) patterns were collected by Rigaku MiniFlex 600. X-ray photoelectron spectroscopy (XPS, Thermo Scientific ESCALAB 250Xi) analysis was carried out on the PHI5000 probe system. The morphology and size of the electrocatalysts were carried out by field emission scanning electron microscopy (FE-SEM, JSM-7800F) and transmission electron microscopy (TEM; JEOL, JEM-2800).

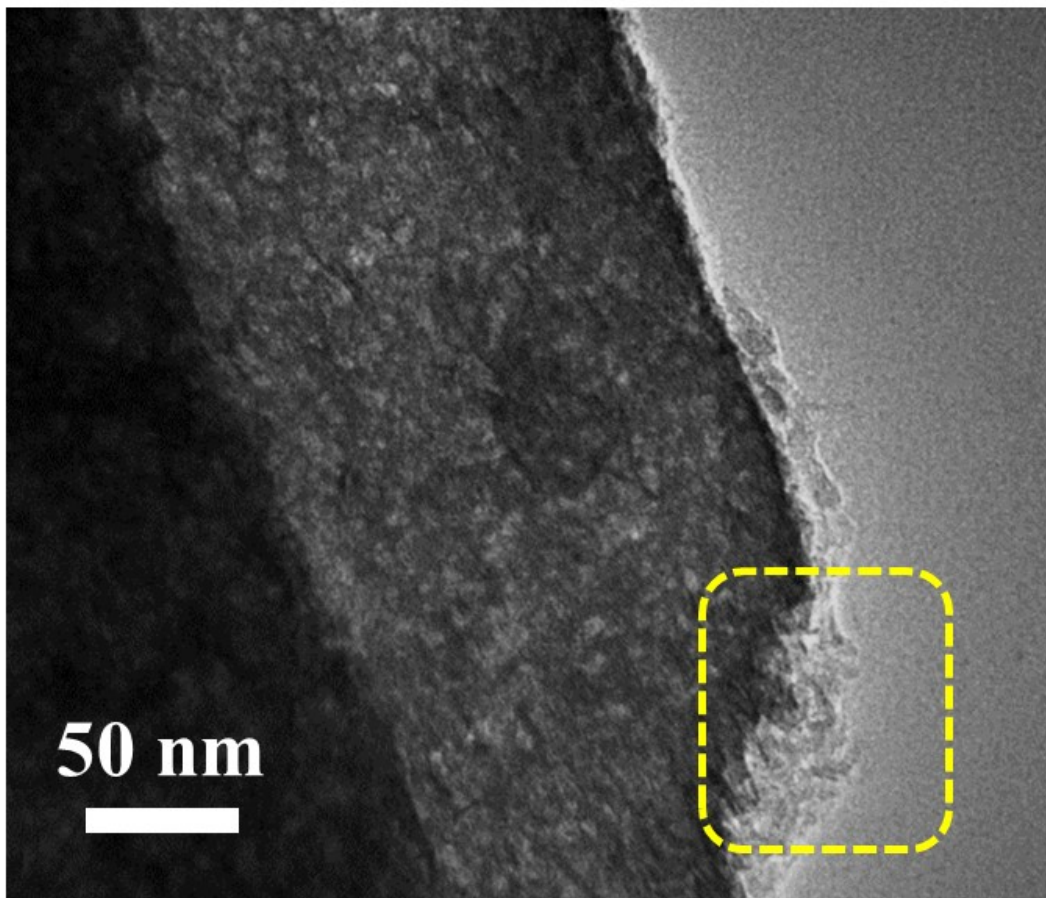

**Figure S1.** TEM image of of Ni-MOFs-Fe after soaked in 1.0 M KOH.

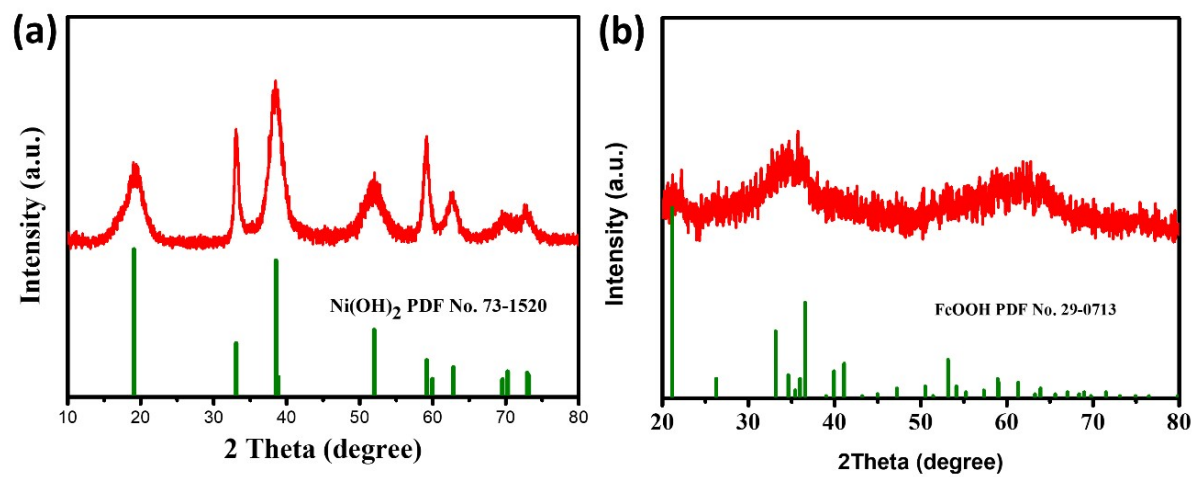

**Figure S2.** (a) XRD patterns of Ni(OH)<sub>2</sub> (named as N-1) and FeOOH (labeled as F-1).

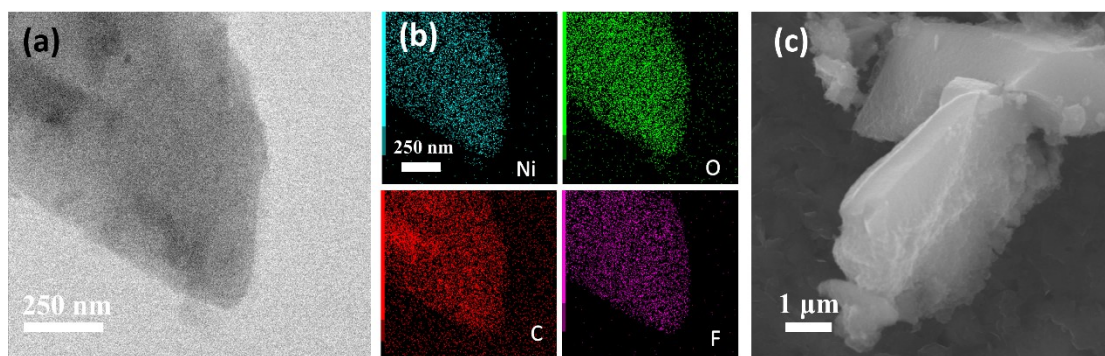

**Figure S3.** (a) TEM and (b) corresponding mapping images of N-1 (F element comes from binder Nafion). (c) SEM images of F-1.

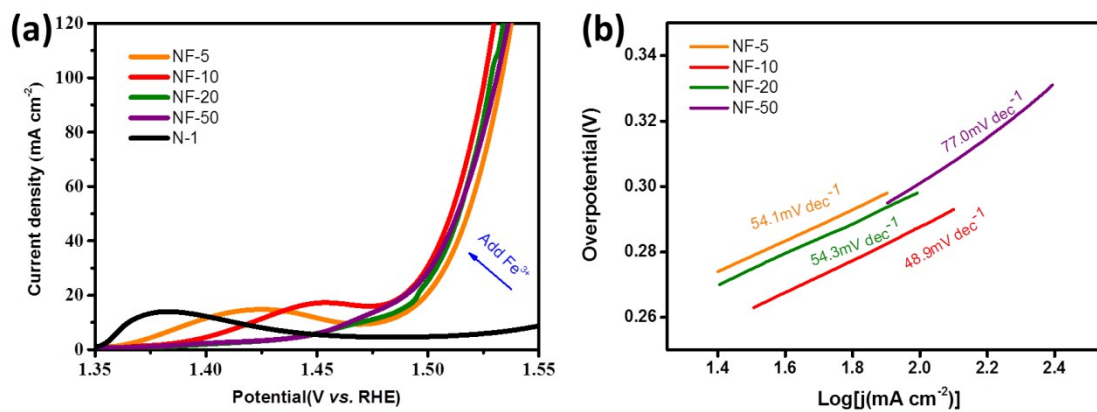

**Figure S4.** (a) Polarization curves of N-1, NF-5, NF-10, NF-20 and NF-50 in O<sub>2</sub>-saturated 1.0 M KOH solution and (b) Tafel plots of above samples.

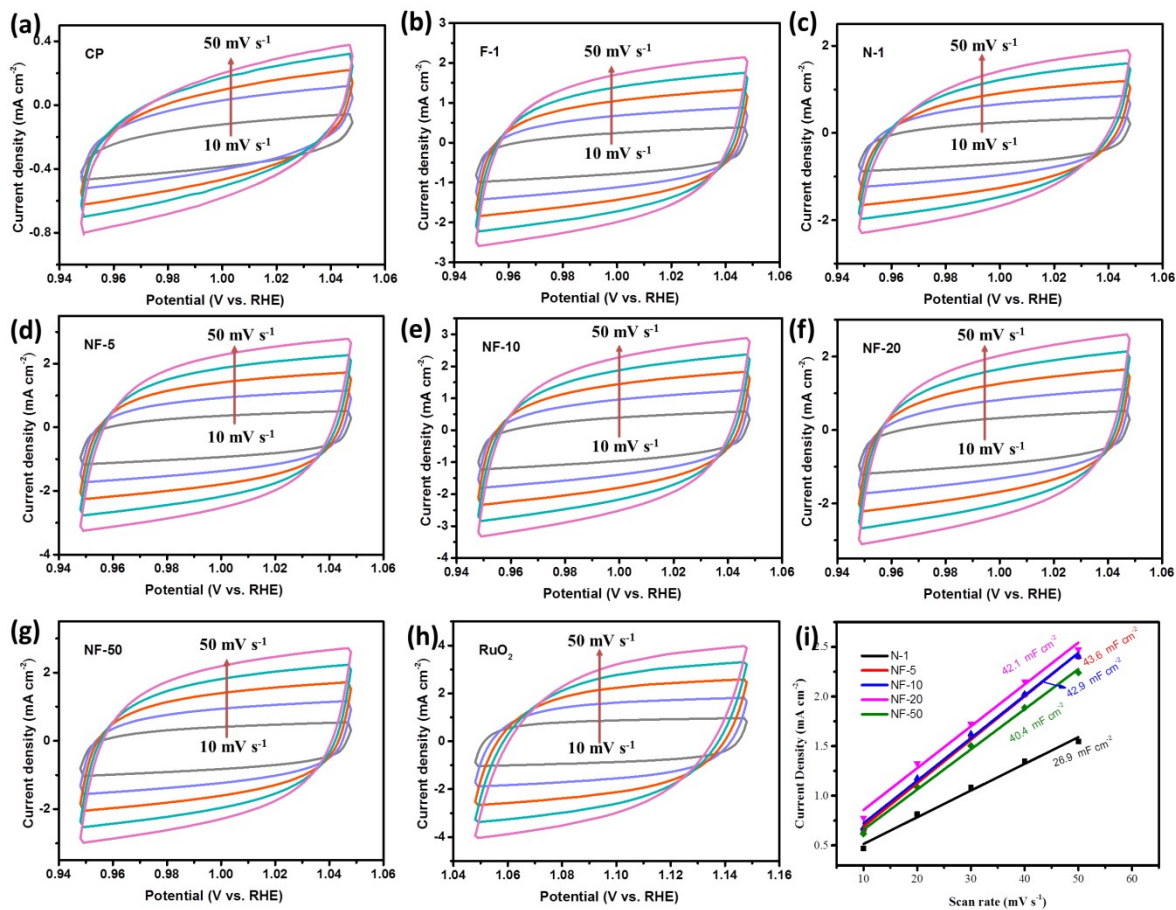

**Figure S5.** Cyclic voltammetry curves of (a) CP, (b) F-1, (c) N-1, (d) NF-5, (e) NF-10 (f) NF-20, (g) NF-50 and (h) RuO<sub>2</sub> with different scan rates. (i) Double-layer capacitance determined by the current density at different scan rates.

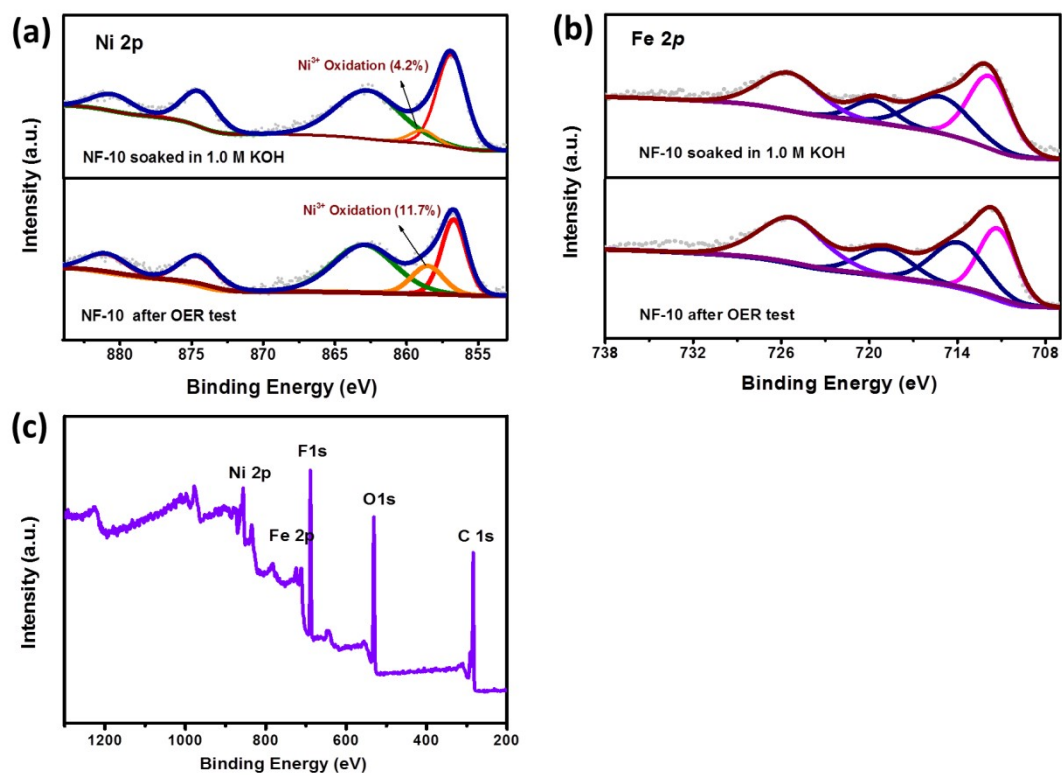

**Figure S6.** High-resolution spectra of (a) Ni 2p and (b) Fe 2p of NF-10 before and after the OER test. (c) Survey spectrum of NF-10.



**Table S1.** Comparison of the performance of NF-10 with similar catalysts reported in the literature.

| Catalysts                                                           | Overpotential /<br>mV<br>(10 mV cm <sup>-2</sup> ) | Tafel<br>slop<br>(mV dec <sup>-1</sup> ) | Electrolyte | References                                     |
|---------------------------------------------------------------------|----------------------------------------------------|------------------------------------------|-------------|------------------------------------------------|
| NF-10                                                               | 280 @50 mA cm <sup>-2</sup>                        | 48.9                                     | 1.0 M KOH   | This work                                      |
| (Fe(II) <sub>1</sub> Fe(III) <sub>1</sub> ) <sub>0.6</sub> /NMOF-Co | 330                                                | 50                                       | 1.0 M KOH   | Chem. Eng. J.,<br>2021, 422,<br>130055.        |
| MIL-53(Co-Fe)/NF                                                    | NA                                                 | 69                                       | 1.0 M KOH   | Nanoscale,<br>2020, 12, 67.                    |
| FN-2                                                                | 275                                                | 56.7                                     | 1.0 M KOH   | Small, 2019, 15,<br>1903410.                   |
| NNU-23                                                              | 365                                                | 81.8                                     | 0.1 M KOH   | Angew. Chem.<br>Int. Ed., 2018,<br>57, 9660.   |
| MAF-X27-OH                                                          | 292                                                | 88                                       | 1.0 M KOH   | J. Am. Chem.<br>Soc., 2016, 138,<br>8336.      |
| NiFe-25                                                             | 299                                                | 48.9                                     | 1.0 M KOH   | Chem. Eng. J.,<br>2021, 423,<br>130204.        |
| NCF-MOF                                                             | 320                                                | 49                                       | 1 M KOH     | Adv. Funct.<br>Mater., 2018,<br>28, 1802129.   |
| NiFe LDH                                                            | 300                                                | 40                                       | 1 M KOH     | Nat. Commun.,<br>2014, 5, 4477.                |
| NiCo/NiCoO <sub>x</sub> @FeOOH                                      | 278                                                | 47.5                                     | 1.0 M KOH   | Nano Res.,<br>2020, 13, 3299.                  |
| NiFe@N doped carbon                                                 | 350                                                | 56                                       | 0.1 M KOH   | Nano Energy,<br>2016, 30, 426.                 |
| Fe/(Ni)OOH                                                          | 290                                                | 32                                       | 1 M KOH     | Angew. Chem.<br>Int., Ed., 2018,<br>57, 172.   |
| FeCo-MOF-EH                                                         | 301                                                | 42                                       | 1.0 M KOH   | Angew. Chem.<br>Int., Ed., 2020,<br>59, 13101. |
| FeCo LDH                                                            | 331                                                | 85                                       | 1 M KOH     | Science, 2016,<br>352, 333.                    |
| Ni <sub>2/3</sub> Fe <sub>1/3</sub> LDH nanosheets                  | 310                                                | 76                                       | 1 M KOH     | ACS Nano,                                      |

|  |  |  |  |                |
|--|--|--|--|----------------|
|  |  |  |  | 2015, 9, 1977. |
|--|--|--|--|----------------|
